# Supplementary material for: Bioreducible, arginine-rich polydisulfide-based siRNA nanocomplexes with excellent tumor penetration for efficient gene silencing
Source: Royal Society of Chemistry journal article supplement (doi:10.1039/d1bm00643f), 2021-01-01
Supplement: d1bm00643f1.pdf [file d1bm00643f1.pdf]

## Electronic Supplementary Information

# **Bioreducible, arginine-rich polydisulfide-based siRNA nanocomplexes with excellent tumor penetration for efficient gene silencing**

Xinyue Zhang,<sup>a,b</sup> Kai Hong,<sup>b</sup> Qingmei Sun,<sup>b</sup> Yunqing Zhu,<sup>\*,a,b</sup> and Jianzhong Du<sup>\*,a,b</sup>

<sup>a</sup> *Department of Orthopedics, Shanghai Tenth People's Hospital, Tongji University, 301 Middle Yanchang Road, Shanghai 200072, China.*

<sup>b</sup> *Department of Polymeric Materials, School of Materials Science and Engineering, Tongji University, 4800 Caoan Road, Shanghai 201804, China.*

*\*Corresponding Author. jzdu@tongji.edu.cn (J.D.); 1019zhuyq@tongji.edu.cn (Y.Z.)*

## Figures, Tables and Calculations

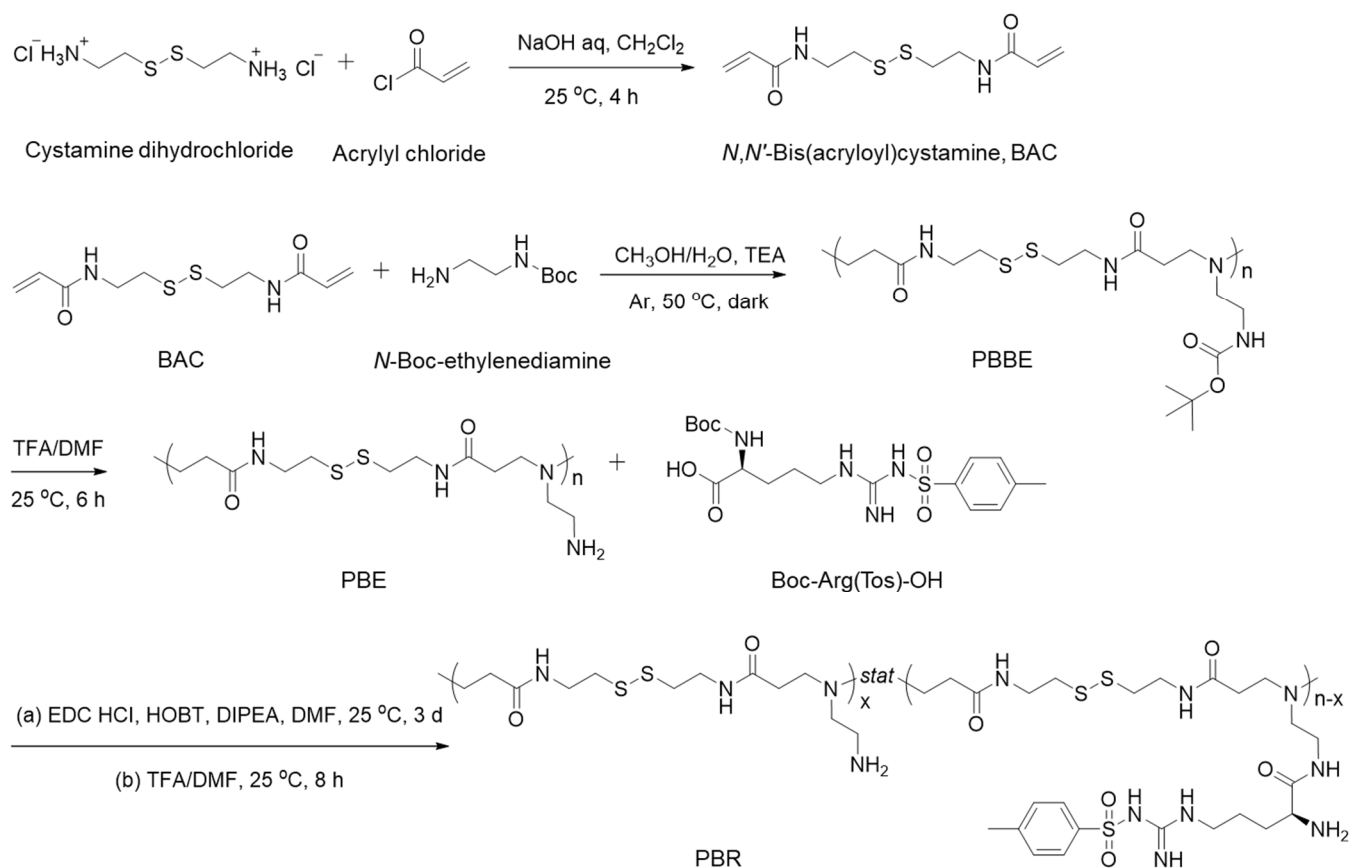

Fig. S1 Syntheses of monomer and polymers.

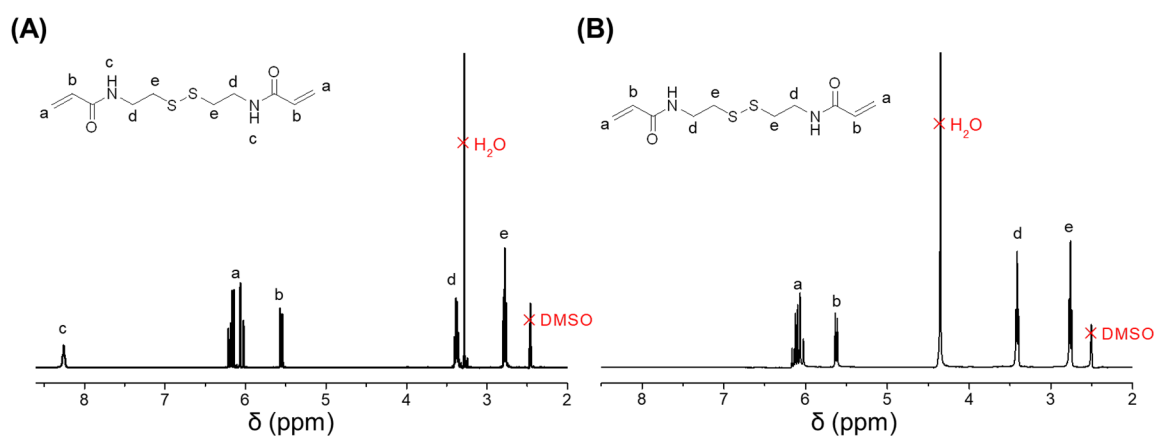

Fig. S2  $^1\text{H}$  NMR spectra of BAC monomer in (a)  $\text{DMSO-}d_6$  and (b)  $\text{D}_2\text{O/DMSO-}d_6 = 1/1$  (v/v).

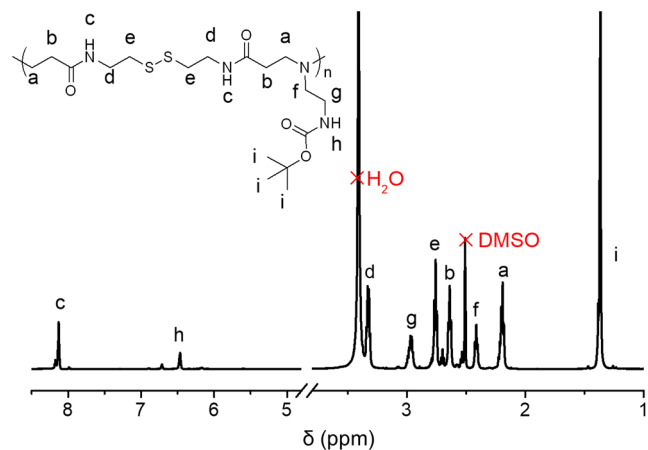

**Fig. S3**  $^1\text{H}$  NMR spectrum of polymer PBBE in  $\text{DMSO-}d_6$ .

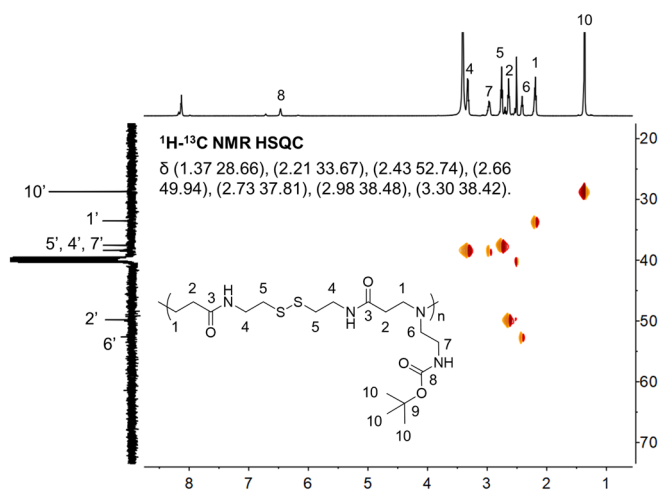

**Fig. S4**  $^1\text{H-}^{13}\text{C}$  HSQC spectrum of polymer PBBE in  $\text{DMSO-}d_6$ , to confirm the assignments in **Fig. S3**.

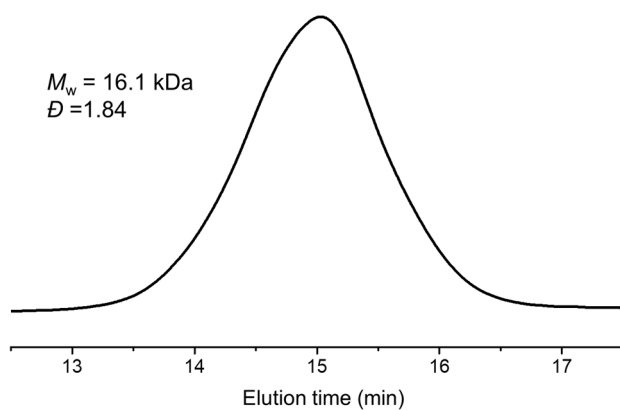

**Fig. S5** SEC trace of PBBE in DMF ( $60\text{ }^\circ\text{C}$ ,  $0.1\text{ wt}\%$  LiBr) after three days of dialysis.

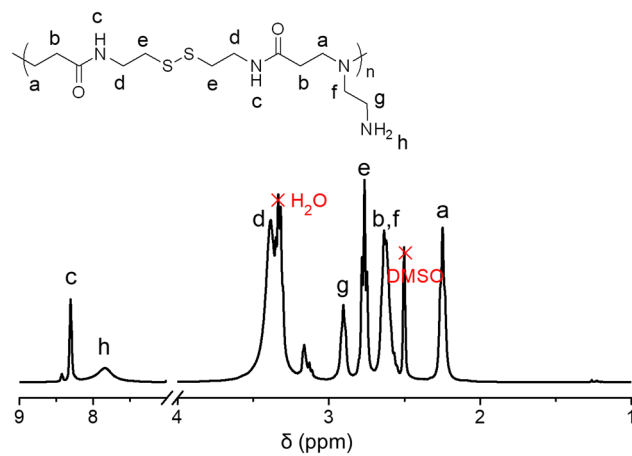

**Fig. S6** <sup>1</sup>H NMR spectrum of polymer PBE in DMSO-*d*<sub>6</sub>.

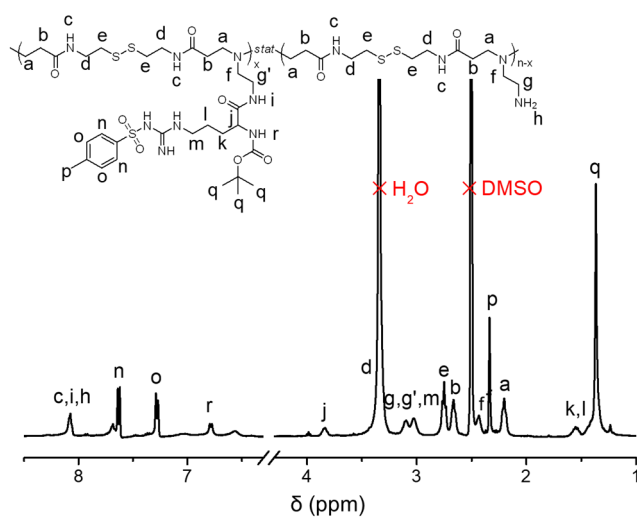

**Fig. S7** <sup>1</sup>H NMR spectrum of polymer PBBR in DMSO-*d*<sub>6</sub>.

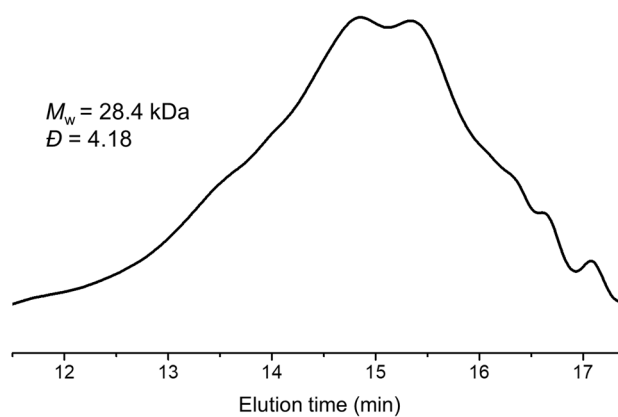

**Fig. S8** SEC trace of PBBR in DMF (60 °C, 0.1% wt LiBr).

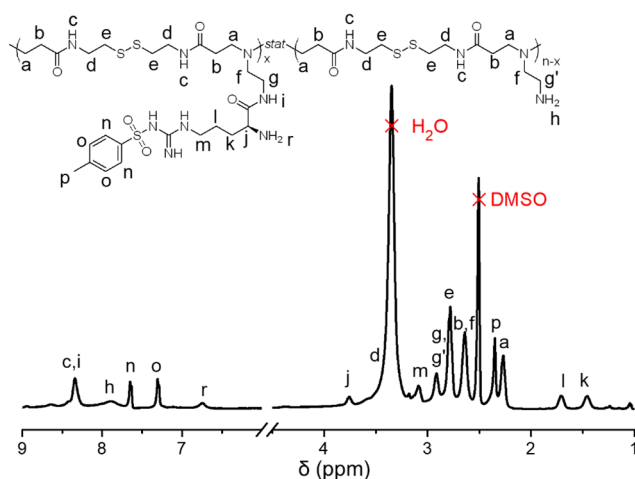

**Fig. S9**  $^1\text{H}$  NMR spectrum of PBR in  $\text{DMSO-}d_6$ .

**Table S1.** Integral areas and calculation of grafting density (G) of  $N^0$ -*p*-tosyl-L-arginine

| Polymer | $A_{(a+p)}/A_{(o+n)}$ | G   |
|---------|-----------------------|-----|
| PBR-1   | 10.25                 | 11% |
| PBR-2   | 3.52                  | 36% |
| PBR-3   | 2.37                  | 62% |
| PBR-4   | 1.81                  | 95% |

In **Table S1**,  $A_{(o+n)}$ ,  $A_{(a+p)}$  are the integral areas of peaks o+n (phenyl group of  $N^0$ -*p*-tosyl-L-arginine, 4x H) and a+p (a: methylene group near the tertiary amine of polymer main chain, 4n H, p: phenyl group of  $N^0$ -*p*-tosyl-L-arginine, 3x H), respectively, in **Fig. S9**. Then the values of grafting density (G) of *p*-toluylsulfonyl arginine are obtained according to the following equations:

$$A_{(o+n)} = 4x$$

$$A_{(a+p)} = 3x + 4n$$

$$G = 100\% \times \frac{x}{n} = 100\% \times \frac{4A_{(o+n)}}{4A_{(a+p)} - 3A_{(o+n)}} = 100\% \times \frac{4}{4 \times \frac{A_{(a+p)}}{A_{(o+n)}} - 3}$$

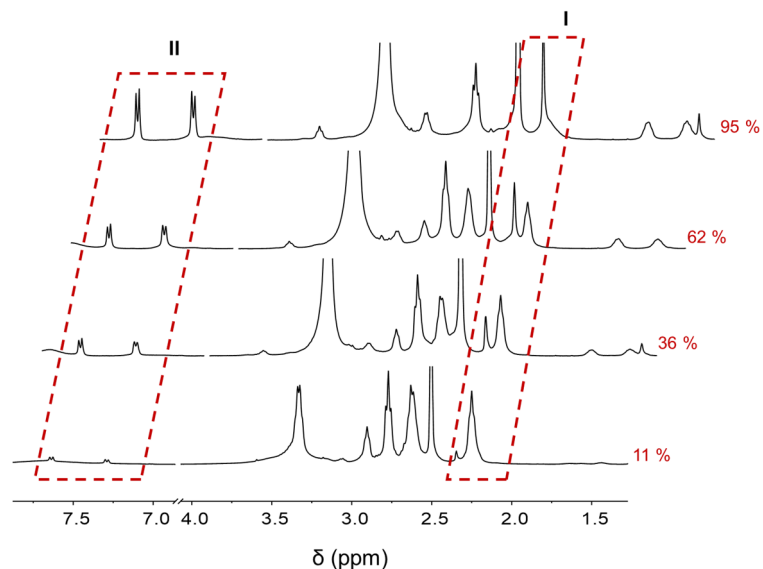

**Fig. S10** Changes in the  $^1\text{H}$  NMR spectra of different PBRs with different grafting density in  $\text{DMSO-}d_6$ . Region I and region II represent the  $A_{(a+p)}$  and  $A_{(o+n)}$ , respectively.

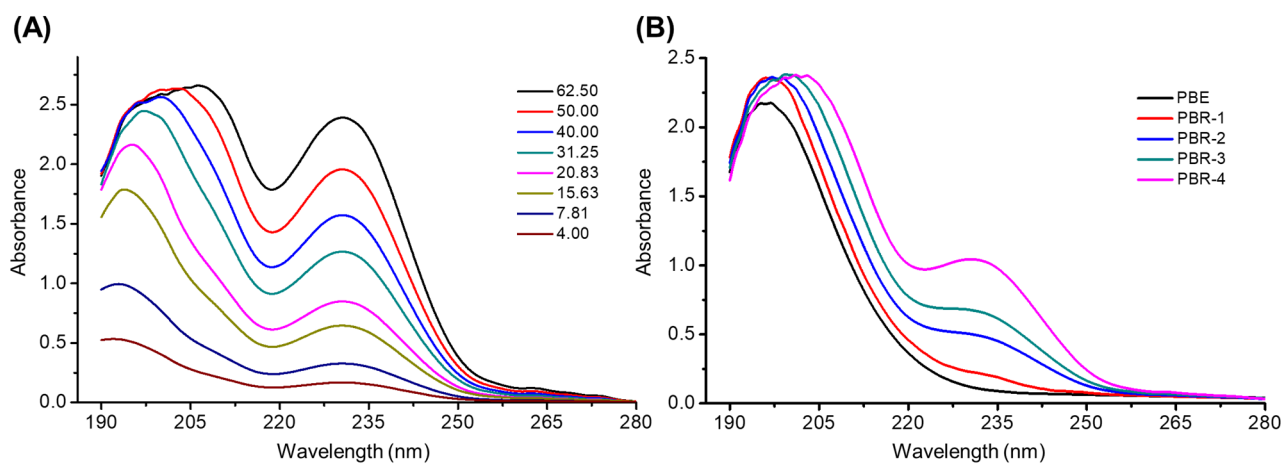

**Fig. S11** (A) UV-Vis spectra of  $N^0$ - $p$ -tosyl-L-arginine at various concentrations ( $\mu\text{g mL}^{-1}$ ) in water. (B) UV-Vis spectra of PBE and different PBR polymers ( $50 \mu\text{g mL}^{-1}$ ) in water. The absorption peak around 230 nm originates from the  $N^0$ - $p$ -tosyl-L-arginine, and the increase in absorbance of it indicates the increasing grafting density of PBR.

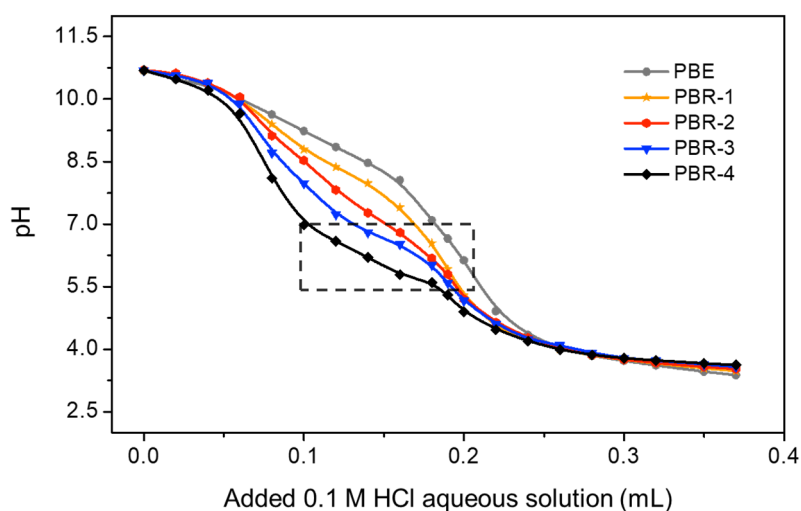

**Fig. S12** Titration curve of PBE and different PBR polymers ( $0.5 \text{ mg mL}^{-1}$ ).

**Table S2.** Variable settings during optimization of PBE/siRNA complexation procedure (mean  $\pm$  SD,  $n = 3$ )

| No. | Weight ratio <sup>a</sup> | Concentration ratio <sup>b</sup> | N/P value | pH of polymer buffer solution | Hydrodynamic diameter (nm) | PDI   | Zeta potential (mV) |
|-----|---------------------------|----------------------------------|-----------|-------------------------------|----------------------------|-------|---------------------|
| 1   | 1                         | 4                                | 2         | 7.4                           | $551.5 \pm 26.4$           | 0.288 | $-19.1 \pm 1.2$     |
| 2   | 5                         | 20                               | 10        | 7.4                           | $415.0 \pm 14.2$           | 0.129 | $-20.9 \pm 0.4$     |
| 3   | 10                        | 40                               | 20        | 7.4                           | $396.4 \pm 16.0$           | 0.257 | $-5.6 \pm 1.1$      |
| 4   | 15                        | 60                               | 30        | 7.4                           | $367.5 \pm 11.3$           | 0.172 | $9.1 \pm 0.6$       |
| 5   | 20                        | 80                               | 39        | 7.4                           | $313.9 \pm 6.7$            | 0.137 | $12.6 \pm 0.3$      |
| 6   | 25                        | 100                              | 49        | 7.4                           | $287.2 \pm 7.3$            | 0.193 | $13.6 \pm 0.5$      |
| 7   | 15                        | 60                               | 30        | 6.4                           | $212.2 \pm 18.0$           | 0.278 | $17.4 \pm 0.5$      |
| 8   | 15                        | 62                               | 30        | 6.4                           | $228.4 \pm 7.5$            | 0.207 | $21.2 \pm 0.3$      |
| 9   | 15                        | 76                               | 30        | 6.4                           | $191.4 \pm 15.8$           | 0.339 | $28.7 \pm 0.7$      |
| 10  | 15                        | 96                               | 30        | 6.4                           | $179.7 \pm 16.3$           | 0.404 | $22.5 \pm 1.4$      |
| 11  | 15                        | 127                              | 30        | 6.4                           | $146.0 \pm 1.8$            | 0.211 | $21.6 \pm 2.2$      |
| 12  | 15                        | 181                              | 30        | 6.4                           | $163.2 \pm 11.3$           | 0.249 | $22.8 \pm 1.6$      |
| 13  | 15                        | 304                              | 30        | 6.4                           | $211.4 \pm 3.4$            | 0.363 | $26.0 \pm 0.8$      |

<sup>a</sup>PBE/siRNA ( $\mu\text{g } \mu\text{g}^{-1}$ ).

<sup>b</sup>Concentration of PBE in HEPES buffer/concentration of siRNA in HEPES buffer ( $\mu\text{g } \mu\text{L}^{-1}/\mu\text{g } \mu\text{L}^{-1}$ ).

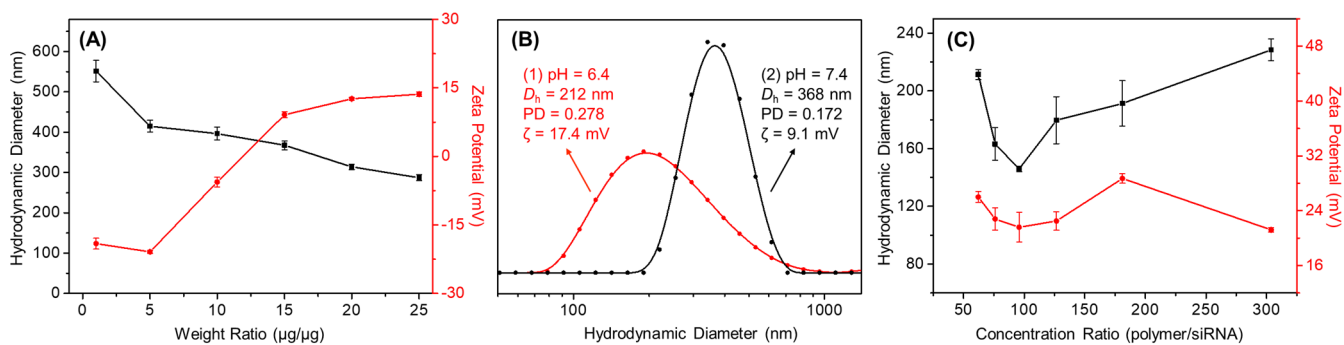

**Fig. S13** DLS study and Zeta potential of different PBE/siRNA nanocomplexes in HEPES buffer in optimizing procedure. (A) PBE/siRNA nanocomplexes prepared with different weight ratio of PBE/siRNA (No.1-6 in **Table S2**). (B) PBE/siRNA nanocomplexes prepared at different pH values of PBE buffer solution (No.4 and No.7 in **Table S2**). (C) PBE/siRNA nanocomplexes prepared with different concentration ratios of PBE and siRNA buffer solution (No.8-13 in **Table S2**). The concentration ratio is expressed as the ratio of initial concentration of PBE ( $\mu\text{g mL}^{-1}$ ) to the initial concentration of siRNA ( $\mu\text{g mL}^{-1}$ ) in their respective HEPES buffer at the beginning of the titration.

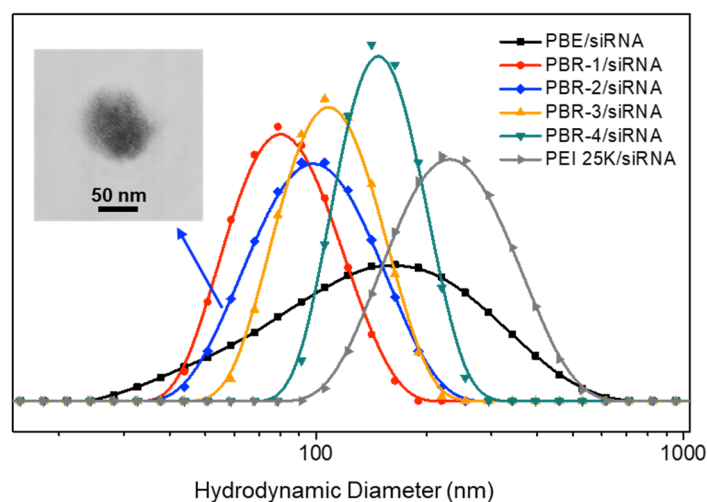

**Fig. S14** Size distribution of different nanocomplexes as determined by dynamic light scattering (DLS) and typical transmission electron microscopy (TEM) image of PBR-2/siRNA nanocomplexes.



**Table S3.** Corresponding data of DLS studies of PBE/siRNA and different PBR/siRNA nanocomplexes in **Fig. S14** (mean  $\pm$  SD,  $n = 3$ )

| Formulation   | RNA conc. (nM) | Polymer conc. ( $\mu\text{g mL}^{-1}$ ) | Weight ratio | Hydrodynamic diameter (nm) | PDI   | Zeta potential (mV) |
|---------------|----------------|-----------------------------------------|--------------|----------------------------|-------|---------------------|
| PBE/siRNA     | 1000           | 200                                     | 15           | $117.0 \pm 2.4$            | 0.268 | $21.3 \pm 1.6$      |
| PBR-1/siRNA   | 1000           | 200                                     | 15           | $85.0 \pm 1.8$             | 0.179 | $24.9 \pm 0.3$      |
| PBR-2/siRNA   | 1000           | 200                                     | 15           | $93.3 \pm 1.0$             | 0.081 | $27.4 \pm 0.8$      |
| PBR-3/siRNA   | 1000           | 200                                     | 15           | $103.5 \pm 2.3$            | 0.044 | $29.7 \pm 0.3$      |
| PBR-4/siRNA   | 1000           | 200                                     | 15           | $155.4 \pm 3.7$            | 0.041 | $34.7 \pm 1.0$      |
| PEI 25K/siRNA | 1000           | 40                                      | 3            | $217.7 \pm 2.5$            | 0.101 | $28.4 \pm 0.8$      |

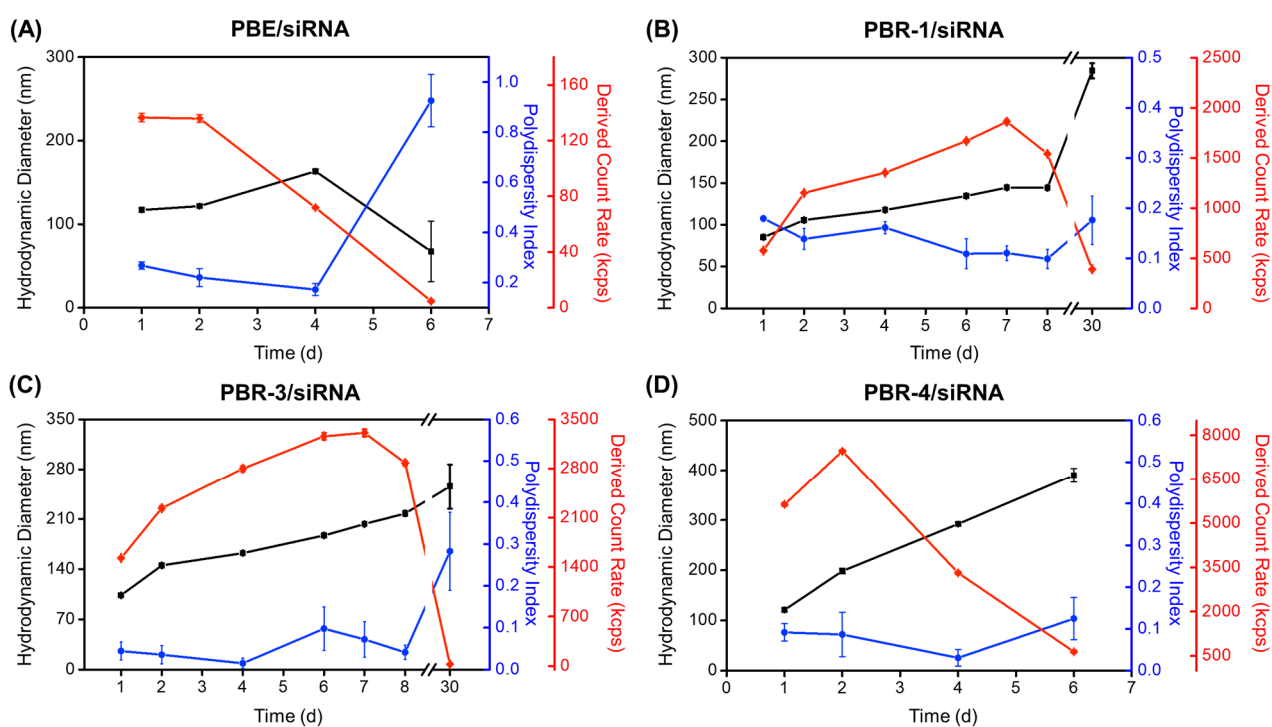

**Fig. S15** DLS analysis of PBE/siRNA and different PBR/siRNA nanocomplexes over time in HEPES buffer (20 mM HEPES, 5.0 wt% glucose in water, pH 7.4, 4 °C storage).

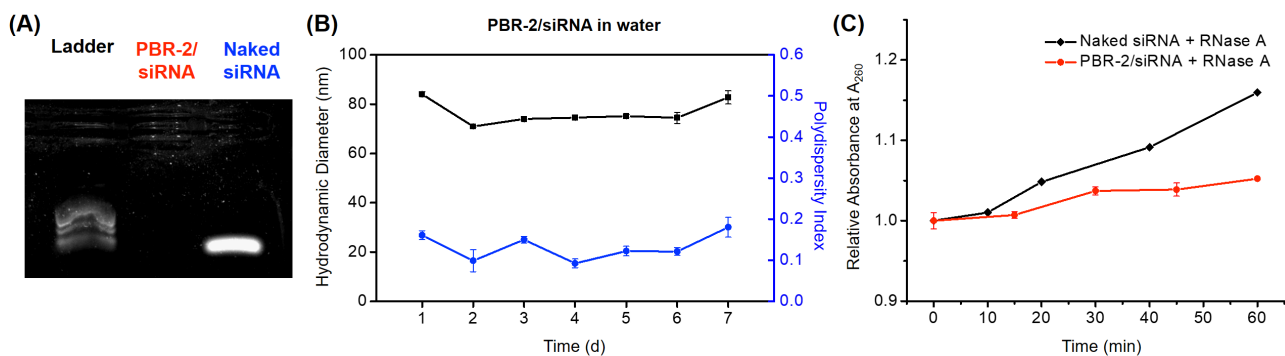

**Fig. S16** (A) Agarose gel retardation analysis of the naked siRNA and PBR-2/siRNA nanocomplexes. (B) DLS analysis of PBR-2/siRNA (100 nM siRNA) over time in diluted aqueous solution (4 °C storage). (C) Changes of relative UV-Vis absorbance at 260 nm of naked siRNA and PBR-2/siRNA nanocomplexes over time in the presence of  $1.0 \mu\text{g mL}^{-1}$  RNase A in HEPES buffer at 25 °C, pH 7.4. The relative absorbance at 260 nm of naked siRNA increased obviously faster than that of PBR-2/siRNA nanocomplexes.

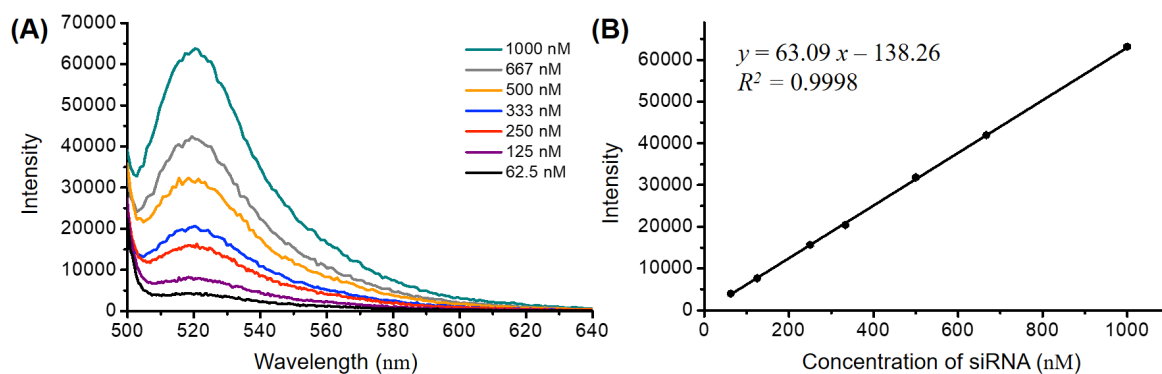

**Fig. S17** (A) The fluorescence spectra of FAM-siRNA at different concentrations and (B) the calibration curve of FAM-siRNA in HEPES buffer ( $\lambda_{\text{ex}} = 492 \text{ nm}$ ).

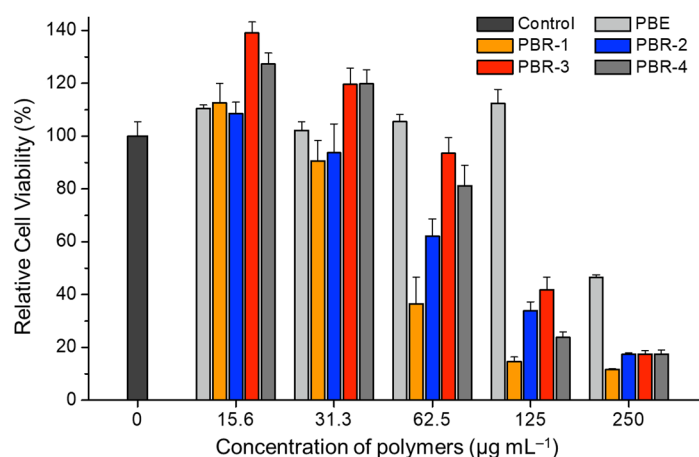

**Fig. S18** Relative cell viability of L02 cells after incubation with increasing concentrations of different polymers for 24 h. The cytotoxicity is negligible when the concentration of polymers is less than  $31.3 \mu\text{g mL}^{-1}$ .

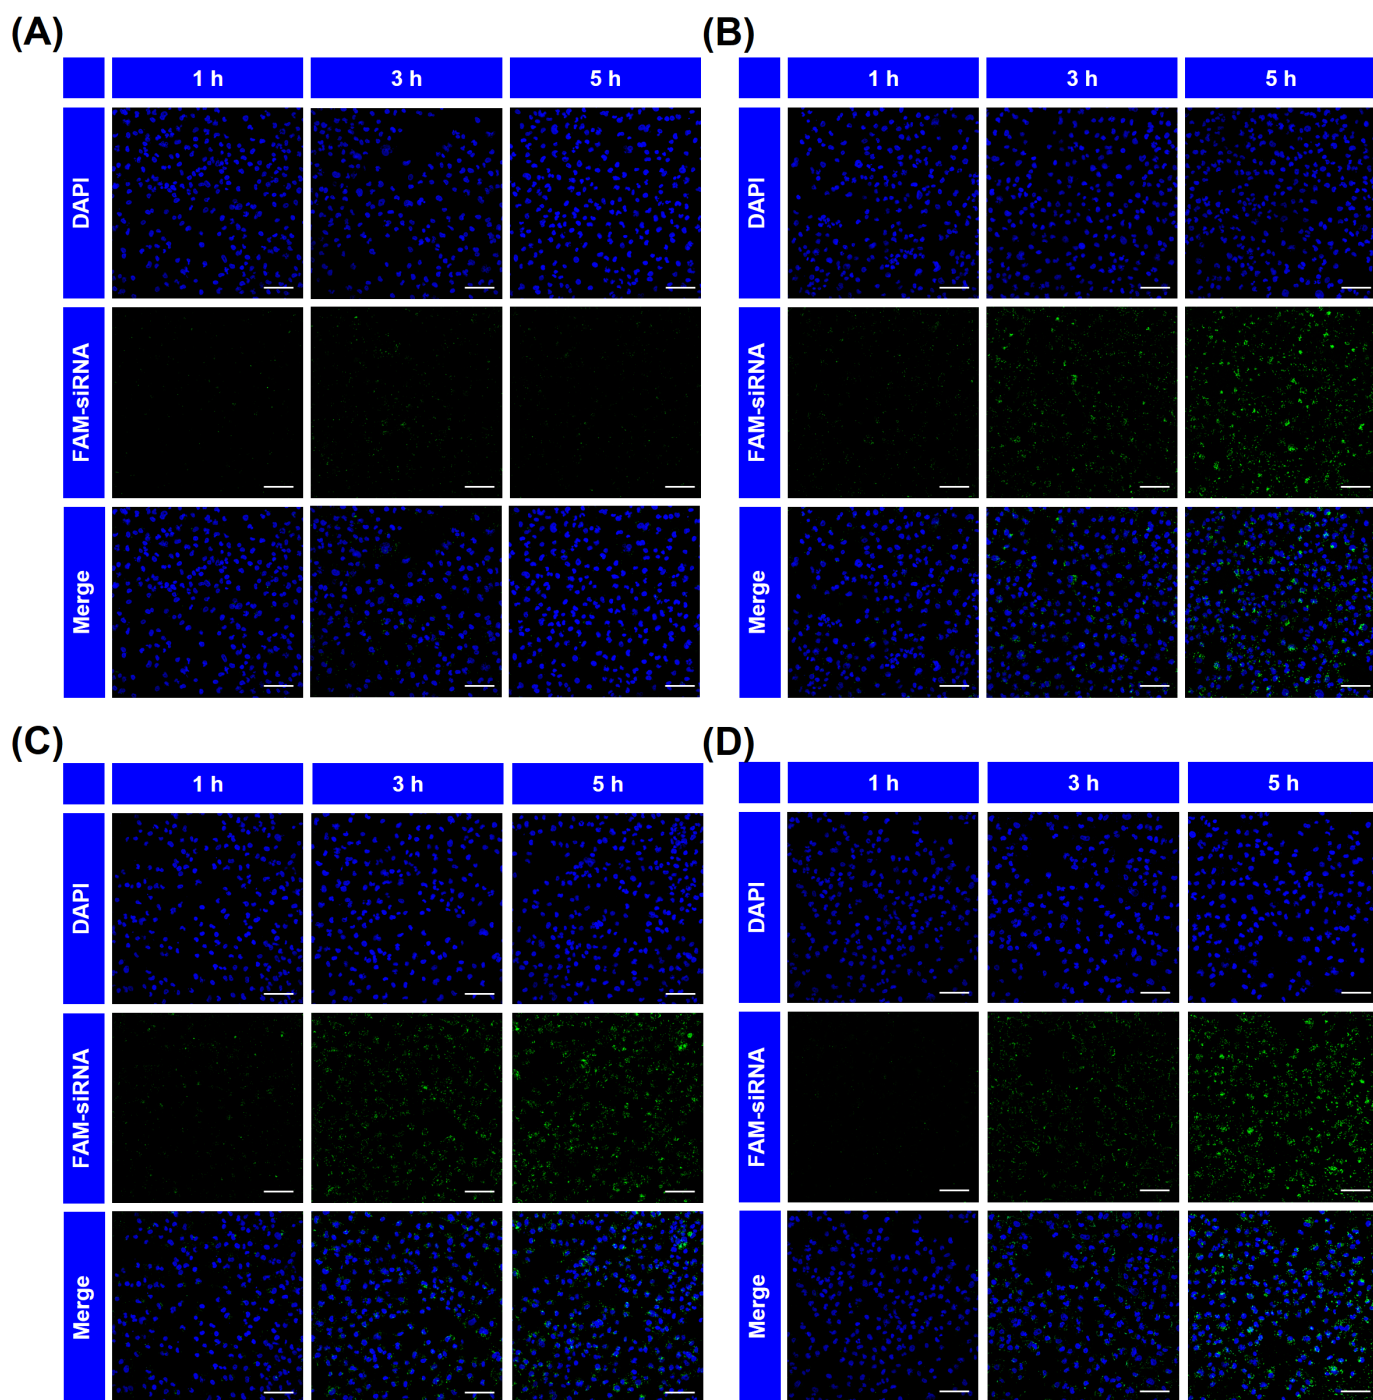

**Fig. S19** Visualization of the degree of cellular uptake of (A) PBE/FAM-siRNA, (B) PBR-1/FAM-siRNA, (C) PBR-3/FAM-siRNA and (D) PBR-4/FAM-siRNA nanocomplexes in PANC-1 cells. Representative CLSM images were taken after different co-incubation time of 1, 3, and 5 h. Green channel: FAM labeled siRNA. Blue channel: the nuclei of PANC-1 cells stained by DAPI. Scale bar: 100  $\mu$ m.

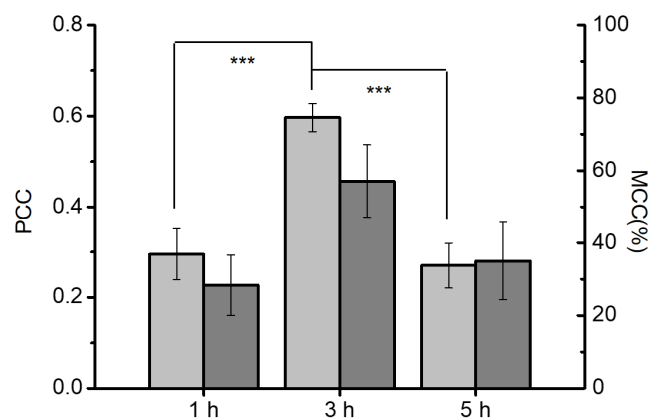

**Fig. S20** PANC-1 cells were incubated with PBR-2/FAM-siRNA nanocomplexes for 1, 3 and 5 h. PCC (Pearson's correlation coefficient) and MCC (Manders' colocalization coefficients) were calculated from the CLSM images for colocalization analyses of PBR-2/FAM-siRNA nanocomplexes (green) and lysosome tracker (red) using ImageJ software. Data are presented as mean  $\pm$  SD ( $n = 3$ ). One-way analysis of variance (ANOVA) was performed to evaluate the significance of the experimental data. A value of 0.05 was selected as the significance level, and the data were indicated with (\*\*\*) for  $p < 0.001$ .

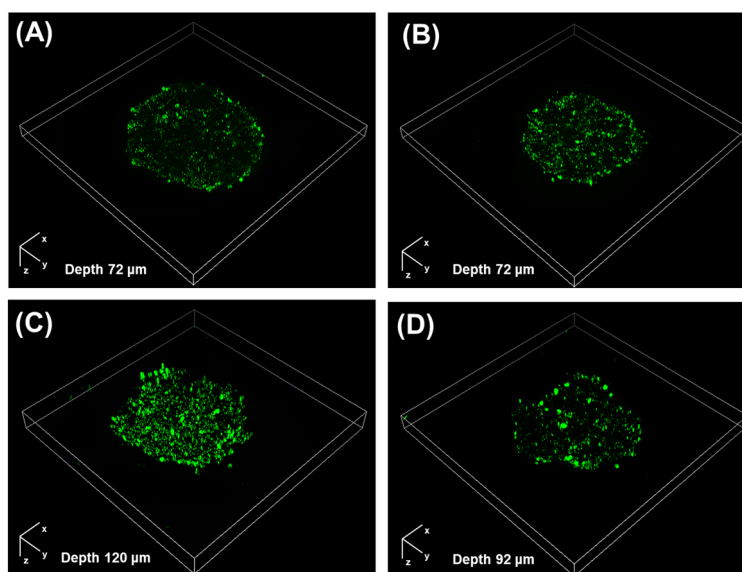

**Fig. S21** CLSM 3D images of *in vitro* penetration of FAM labeled PBR-2/siRNA nanocomplexes in PANC-1 multicellular spheroids (MCSs). The MCSs were incubated with PBR-2/siRNA nanocomplexes (100 nM siRNA equivalent) for (A) 3, (B) 6, (C) 9 and (D) 18 h, then taken out, washed with PBS and observed by CLSM Z-stack scanning.

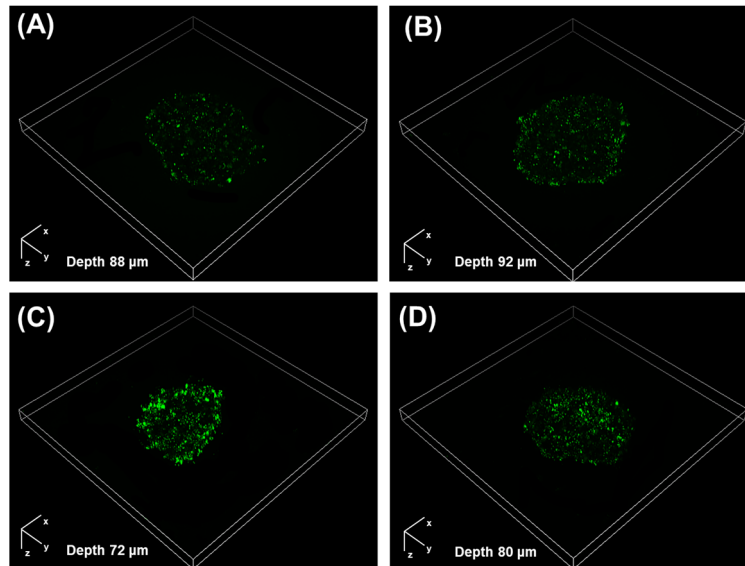

**Fig. S22** CLSM 3D images of *in vitro* penetration of FAM labeled PBE/siRNA nanocomplexes in PANC-1 multicellular spheroids (MCSs). The MCSs were incubated with PBE/siRNA nanocomplexes (100 nM siRNA equivalent) for (A) 3, (B) 6, (C) 9 and (D) 18 h, then taken out, washed with PBS and observed by CLSM Z-stack scanning.

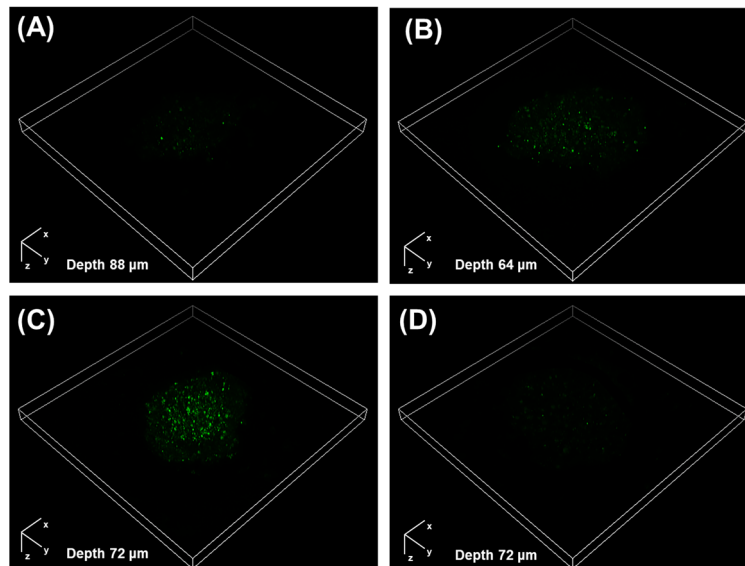

**Fig. S23** CLSM 3D images of *in vitro* penetration of FAM labeled PEI 25K/siRNA nanocomplexes in PANC-1 multicellular spheroids (MCSs). The MCSs were incubated with PEI 25K/siRNA nanocomplexes (100 nM siRNA equivalent) for (A) 3, (B) 6, (C) 9 and (D) 18 h, then taken out, washed with PBS and observed by CLSM Z-stack scanning.
